# Supplementary material for: Reliability and Validity of The Korean Translation of The Achilles Tendon Total Rupture Score
Source: Research Square preprint supplement (doi:10.21203/rs.3.rs-546862/v1), 2021-06-03
Supplement: Supplementary file 2 [file e27291063b56fe69a7effc00.docx]

**Appendix legend**

**Appendix 1.** Korean translation of the Achilles tendon Total Rupture Score
